# Supplementary material for: Time Series Transcriptomic Analysis by RNA Sequencing Reveals a Key Role of PI3K in Sepsis-Induced Myocardial Injury in Mice
Source: Frontiers journal article supplement (doi:10.3389/fphys.2022.903164), 2022-06-01
Supplement: Data_Sheet_1.zip [file Data_Sheet_1.zip]

## Sheet: Gene interaction
source	relation	Abbreviative Relation	target	pathway_id	pathway_name
Plcb1	compound	c	Pik3cg	path:mmu00562	Inositol phosphate metabolism
Plcd1	compound	c	Pik3cd	path:mmu00562	Inositol phosphate metabolism
Plcd1	compound	c	Pik3cg	path:mmu00562	Inositol phosphate metabolism
Plcg1	compound	c	Pik3cd	path:mmu00562	Inositol phosphate metabolism
Plcg1	compound	c	Pik3cg	path:mmu00562	Inositol phosphate metabolism
Alox5	compound	c	Ptgs2	path:mmu00590	Arachidonic acid metabolism
Alox12	compound	c	Alox5	path:mmu00590	Arachidonic acid metabolism
Alox12	compound	c	Ptgs2	path:mmu00590	Arachidonic acid metabolism
Egf	activation	a	Csf1r	path:mmu04014	Ras signaling pathway
Egf	activation	a	Fgfr1	path:mmu04014	Ras signaling pathway
Egf	activation	a	Igf1r	path:mmu04014	Ras signaling pathway
Egf	activation	a	Insr	path:mmu04014	Ras signaling pathway
Egf	activation	a	Kdr	path:mmu04014	Ras signaling pathway
Egf	activation	a	Kit	path:mmu04014	Ras signaling pathway
Egf	activation	a	Met	path:mmu04014	Ras signaling pathway
Egf	activation	a	Ngfr	path:mmu04014	Ras signaling pathway
Igf1	activation	a	Csf1r	path:mmu04014	Ras signaling pathway
Igf1	activation	a	Fgfr1	path:mmu04014	Ras signaling pathway
Igf1	activation	a	Igf1r	path:mmu04014	Ras signaling pathway
Igf1	activation	a	Insr	path:mmu04014	Ras signaling pathway
Igf1	activation	a	Kdr	path:mmu04014	Ras signaling pathway
Igf1	activation	a	Kit	path:mmu04014	Ras signaling pathway
Igf1	activation	a	Met	path:mmu04014	Ras signaling pathway
Igf1	activation	a	Ngfr	path:mmu04014	Ras signaling pathway
Vegfa	activation	a	Csf1r	path:mmu04014	Ras signaling pathway
Vegfa	activation	a	Fgfr1	path:mmu04014	Ras signaling pathway
Vegfa	activation	a	Igf1r	path:mmu04014	Ras signaling pathway
Vegfa	activation	a	Insr	path:mmu04014	Ras signaling pathway
Vegfa	activation	a	Kdr	path:mmu04014	Ras signaling pathway
Vegfa	activation	a	Kit	path:mmu04014	Ras signaling pathway
Vegfa	activation	a	Met	path:mmu04014	Ras signaling pathway
Vegfa	activation	a	Ngfr	path:mmu04014	Ras signaling pathway
Csf1r	activation	a	Shc4	path:mmu04014	Ras signaling pathway
Fgfr1	activation	a	Shc4	path:mmu04014	Ras signaling pathway
Igf1r	activation	a	Shc4	path:mmu04014	Ras signaling pathway
Insr	activation	a	Shc4	path:mmu04014	Ras signaling pathway
Kdr	activation	a	Shc4	path:mmu04014	Ras signaling pathway
Kit	activation	a	Shc4	path:mmu04014	Ras signaling pathway
Met	activation	a	Shc4	path:mmu04014	Ras signaling pathway
Ngfr	activation	a	Shc4	path:mmu04014	Ras signaling pathway
Nras	activation	a	Pik3cd	path:mmu04014	Ras signaling pathway
Nras	activation	a	Pik3r1	path:mmu04014	Ras signaling pathway
Nras	activation	a	Pik3cg	path:mmu04014	Ras signaling pathway
Nras	activation	a	Pik3r5	path:mmu04014	Ras signaling pathway
Pik3cd	activation	a	Rac3	path:mmu04014	Ras signaling pathway
Pik3r1	activation	a	Rac3	path:mmu04014	Ras signaling pathway
Pik3cg	activation	a	Rac3	path:mmu04014	Ras signaling pathway
Pik3r5	activation	a	Rac3	path:mmu04014	Ras signaling pathway
Egf	activation	a	Csf1r	path:mmu04015	Rap1 signaling pathway
Egf	activation	a	Fgfr1	path:mmu04015	Rap1 signaling pathway
Egf	activation	a	Igf1r	path:mmu04015	Rap1 signaling pathway
Egf	activation	a	Insr	path:mmu04015	Rap1 signaling pathway
Egf	activation	a	Kdr	path:mmu04015	Rap1 signaling pathway
Egf	activation	a	Kit	path:mmu04015	Rap1 signaling pathway
Egf	activation	a	Met	path:mmu04015	Rap1 signaling pathway
Egf	activation	a	Ngfr	path:mmu04015	Rap1 signaling pathway
Igf1	activation	a	Csf1r	path:mmu04015	Rap1 signaling pathway
Igf1	activation	a	Fgfr1	path:mmu04015	Rap1 signaling pathway
Igf1	activation	a	Igf1r	path:mmu04015	Rap1 signaling pathway
Igf1	activation	a	Insr	path:mmu04015	Rap1 signaling pathway
Igf1	activation	a	Kdr	path:mmu04015	Rap1 signaling pathway
Igf1	activation	a	Kit	path:mmu04015	Rap1 signaling pathway
Igf1	activation	a	Met	path:mmu04015	Rap1 signaling pathway
Igf1	activation	a	Ngfr	path:mmu04015	Rap1 signaling pathway
Vegfa	activation	a	Csf1r	path:mmu04015	Rap1 signaling pathway
Vegfa	activation	a	Fgfr1	path:mmu04015	Rap1 signaling pathway
Vegfa	activation	a	Igf1r	path:mmu04015	Rap1 signaling pathway
Vegfa	activation	a	Insr	path:mmu04015	Rap1 signaling pathway
Vegfa	activation	a	Kdr	path:mmu04015	Rap1 signaling pathway
Vegfa	activation	a	Kit	path:mmu04015	Rap1 signaling pathway
Vegfa	activation	a	Met	path:mmu04015	Rap1 signaling pathway
Vegfa	activation	a	Ngfr	path:mmu04015	Rap1 signaling pathway
Csf1r	activation	a	Plcb1	path:mmu04015	Rap1 signaling pathway
Fgfr1	activation	a	Plcb1	path:mmu04015	Rap1 signaling pathway
Igf1r	activation	a	Plcb1	path:mmu04015	Rap1 signaling pathway
Insr	activation	a	Plcb1	path:mmu04015	Rap1 signaling pathway
Kdr	activation	a	Plcb1	path:mmu04015	Rap1 signaling pathway
Kit	activation	a	Plcb1	path:mmu04015	Rap1 signaling pathway
Met	activation	a	Plcb1	path:mmu04015	Rap1 signaling pathway
Ngfr	activation	a	Plcb1	path:mmu04015	Rap1 signaling pathway
Prkca	phosphorylation	pho	Nras	path:mmu04010	MAPK signaling pathway
Prkcb	phosphorylation	pho	Nras	path:mmu04010	MAPK signaling pathway
Plcg1	compound	c	Camk2a	path:mmu04012	ErbB signaling pathway
Plcg1	compound	c	Camk2b	path:mmu04012	ErbB signaling pathway
Plcg1	compound	c	Prkca	path:mmu04012	ErbB signaling pathway
Plcg1	compound	c	Prkcb	path:mmu04012	ErbB signaling pathway
Plcb1	compound	c	Camk2a	path:mmu04310	Wnt signaling pathway
Plcb1	compound	c	Camk2b	path:mmu04310	Wnt signaling pathway
Plcb1	compound	c	Prkca	path:mmu04310	Wnt signaling pathway
Plcb1	compound	c	Prkcb	path:mmu04310	Wnt signaling pathway
Prkaca	activation	a	Gli2	path:mmu04340	Hedgehog signaling pathway
Gli2	inhibition	inh	Bcl2	path:mmu04340	Hedgehog signaling pathway
Gli2	activation	a	Bcl2	path:mmu04340	Hedgehog signaling pathway
Plcg1	compound	c	Prkca	path:mmu04370	VEGF signaling pathway
Plcg1	compound	c	Prkcb	path:mmu04370	VEGF signaling pathway
Pik3cd	compound	c	Rac3	path:mmu04370	VEGF signaling pathway
Pik3r1	compound	c	Rac3	path:mmu04370	VEGF signaling pathway
Pik3cg	compound	c	Rac3	path:mmu04370	VEGF signaling pathway
Pik3r5	compound	c	Rac3	path:mmu04370	VEGF signaling pathway
Vegfa	activation	a	Kdr	path:mmu04370	VEGF signaling pathway
Kdr	activation	a	Plcg1	path:mmu04370	VEGF signaling pathway
Kdr	activation	a	Pik3cd	path:mmu04370	VEGF signaling pathway
Kdr	activation	a	Pik3r1	path:mmu04370	VEGF signaling pathway
Kdr	activation	a	Pik3cg	path:mmu04370	VEGF signaling pathway
Kdr	activation	a	Pik3r5	path:mmu04370	VEGF signaling pathway
Ctf1	activation	a	Lifr	path:mmu04630	Jak-STAT signaling pathway
Il11	activation	a	Lifr	path:mmu04630	Jak-STAT signaling pathway
Il15	activation	a	Lifr	path:mmu04630	Jak-STAT signaling pathway
Il6	activation	a	Lifr	path:mmu04630	Jak-STAT signaling pathway
Jak2	activation	a	Stat3	path:mmu04630	Jak-STAT signaling pathway
Jak3	activation	a	Stat3	path:mmu04630	Jak-STAT signaling pathway
Tyk2	activation	a	Stat3	path:mmu04630	Jak-STAT signaling pathway
Jak2	activation	a	Pik3cd	path:mmu04630	Jak-STAT signaling pathway
Jak2	activation	a	Pik3r1	path:mmu04630	Jak-STAT signaling pathway
Jak2	activation	a	Pik3cg	path:mmu04630	Jak-STAT signaling pathway
Jak2	activation	a	Pik3r5	path:mmu04630	Jak-STAT signaling pathway
Jak3	activation	a	Pik3cd	path:mmu04630	Jak-STAT signaling pathway
Jak3	activation	a	Pik3r1	path:mmu04630	Jak-STAT signaling pathway
Jak3	activation	a	Pik3cg	path:mmu04630	Jak-STAT signaling pathway
Jak3	activation	a	Pik3r5	path:mmu04630	Jak-STAT signaling pathway
Tyk2	activation	a	Pik3cd	path:mmu04630	Jak-STAT signaling pathway
Tyk2	activation	a	Pik3r1	path:mmu04630	Jak-STAT signaling pathway
Tyk2	activation	a	Pik3cg	path:mmu04630	Jak-STAT signaling pathway
Tyk2	activation	a	Pik3r5	path:mmu04630	Jak-STAT signaling pathway
Lifr	binding/association	b(a)	Jak2	path:mmu04630	Jak-STAT signaling pathway
Lifr	binding/association	b(a)	Jak3	path:mmu04630	Jak-STAT signaling pathway
Lifr	binding/association	b(a)	Tyk2	path:mmu04630	Jak-STAT signaling pathway
Egf	activation	a	Igf1r	path:mmu04066	HIF-1 signaling pathway
Egf	activation	a	Insr	path:mmu04066	HIF-1 signaling pathway
Igf1	activation	a	Igf1r	path:mmu04066	HIF-1 signaling pathway
Igf1	activation	a	Insr	path:mmu04066	HIF-1 signaling pathway
Stat3	expression	ex	Hif1a	path:mmu04066	HIF-1 signaling pathway
Rela	expression	ex	Hif1a	path:mmu04066	HIF-1 signaling pathway
Igf1r	activation	a	Pik3cd	path:mmu04066	HIF-1 signaling pathway
Igf1r	activation	a	Pik3r1	path:mmu04066	HIF-1 signaling pathway
Igf1r	activation	a	Pik3cg	path:mmu04066	HIF-1 signaling pathway
Igf1r	activation	a	Pik3r5	path:mmu04066	HIF-1 signaling pathway
Insr	activation	a	Pik3cd	path:mmu04066	HIF-1 signaling pathway
Insr	activation	a	Pik3r1	path:mmu04066	HIF-1 signaling pathway
Insr	activation	a	Pik3cg	path:mmu04066	HIF-1 signaling pathway
Insr	activation	a	Pik3r5	path:mmu04066	HIF-1 signaling pathway
Igf1	activation	a	Igf1r	path:mmu04068	FoxO signaling pathway
Il6	activation	a	Stat3	path:mmu04068	FoxO signaling pathway
Plcd1	compound	c	Prkca	path:mmu04020	Calcium signaling pathway
Plcd1	compound	c	Prkcb	path:mmu04020	Calcium signaling pathway
Plcb1	compound	c	Prkca	path:mmu04020	Calcium signaling pathway
Plcb1	compound	c	Prkcb	path:mmu04020	Calcium signaling pathway
Plcg1	compound	c	Prkca	path:mmu04020	Calcium signaling pathway
Plcg1	compound	c	Prkcb	path:mmu04020	Calcium signaling pathway
Plcb1	compound	c	Pik3r1	path:mmu04070	Phosphatidylinositol signaling system
Plcb1	compound	c	Pik3r5	path:mmu04070	Phosphatidylinositol signaling system
Plcd1	compound	c	Pik3r1	path:mmu04070	Phosphatidylinositol signaling system
Plcd1	compound	c	Pik3r5	path:mmu04070	Phosphatidylinositol signaling system
Plcg1	compound	c	Pik3r1	path:mmu04070	Phosphatidylinositol signaling system
Plcg1	compound	c	Pik3r5	path:mmu04070	Phosphatidylinositol signaling system
Plcb1	compound	c	Pik3cd	path:mmu04070	Phosphatidylinositol signaling system
Plcb1	compound	c	Pik3cg	path:mmu04070	Phosphatidylinositol signaling system
Plcd1	compound	c	Pik3cd	path:mmu04070	Phosphatidylinositol signaling system
Plcd1	compound	c	Pik3cg	path:mmu04070	Phosphatidylinositol signaling system
Plcg1	compound	c	Pik3cd	path:mmu04070	Phosphatidylinositol signaling system
Plcg1	compound	c	Pik3cg	path:mmu04070	Phosphatidylinositol signaling system
Pi4k2a	compound	c	Pik3r1	path:mmu04070	Phosphatidylinositol signaling system
Pi4k2a	compound	c	Pik3r5	path:mmu04070	Phosphatidylinositol signaling system
Pi4k2a	compound	c	Plcb1	path:mmu04070	Phosphatidylinositol signaling system
Pi4k2a	compound	c	Plcd1	path:mmu04070	Phosphatidylinositol signaling system
Pi4k2a	compound	c	Plcg1	path:mmu04070	Phosphatidylinositol signaling system
Plcb1	compound	c	Plcd1	path:mmu04070	Phosphatidylinositol signaling system
Plcb1	compound	c	Plcg1	path:mmu04070	Phosphatidylinositol signaling system
Plcd1	compound	c	Plcg1	path:mmu04070	Phosphatidylinositol signaling system
Egf	activation	a	Insr	path:mmu04072	Phospholipase D signaling pathway
Egf	activation	a	Kit	path:mmu04072	Phospholipase D signaling pathway
Insr	activation	a	Shc4	path:mmu04072	Phospholipase D signaling pathway
Kit	activation	a	Shc4	path:mmu04072	Phospholipase D signaling pathway
Insr	activation	a	Pik3cd	path:mmu04072	Phospholipase D signaling pathway
Insr	activation	a	Pik3r1	path:mmu04072	Phospholipase D signaling pathway
Insr	activation	a	Pik3cg	path:mmu04072	Phospholipase D signaling pathway
Insr	activation	a	Pik3r5	path:mmu04072	Phospholipase D signaling pathway
Kit	activation	a	Pik3cd	path:mmu04072	Phospholipase D signaling pathway
Kit	activation	a	Pik3r1	path:mmu04072	Phospholipase D signaling pathway
Kit	activation	a	Pik3cg	path:mmu04072	Phospholipase D signaling pathway
Kit	activation	a	Pik3r5	path:mmu04072	Phospholipase D signaling pathway
Prkca	activation	a	Pld1	path:mmu04072	Phospholipase D signaling pathway
Cxcr2	activation	a	Plcb1	path:mmu04072	Phospholipase D signaling pathway
Pik3cd	activation	a	Rac3	path:mmu04071	Sphingolipid signaling pathway
Pik3r1	activation	a	Rac3	path:mmu04071	Sphingolipid signaling pathway
Pik3cg	activation	a	Rac3	path:mmu04071	Sphingolipid signaling pathway
Pik3r5	activation	a	Rac3	path:mmu04071	Sphingolipid signaling pathway
Ppp2r1b	inhibition	inh	Bcl2	path:mmu04071	Sphingolipid signaling pathway
Prkaca	activation	a	Cacna1s	path:mmu04024	cAMP signaling pathway
Creb3l4	expression	ex	Fos	path:mmu04024	cAMP signaling pathway
Egf	activation	a	Csf1r	path:mmu04151	PI3K-Akt signaling pathway
Egf	activation	a	Fgfr1	path:mmu04151	PI3K-Akt signaling pathway
Egf	activation	a	Igf1r	path:mmu04151	PI3K-Akt signaling pathway
Egf	activation	a	Insr	path:mmu04151	PI3K-Akt signaling pathway
Egf	activation	a	Kdr	path:mmu04151	PI3K-Akt signaling pathway
Egf	activation	a	Kit	path:mmu04151	PI3K-Akt signaling pathway
Egf	activation	a	Met	path:mmu04151	PI3K-Akt signaling pathway
Egf	activation	a	Ngfr	path:mmu04151	PI3K-Akt signaling pathway
Igf1	activation	a	Csf1r	path:mmu04151	PI3K-Akt signaling pathway
Igf1	activation	a	Fgfr1	path:mmu04151	PI3K-Akt signaling pathway
Igf1	activation	a	Igf1r	path:mmu04151	PI3K-Akt signaling pathway
Igf1	activation	a	Insr	path:mmu04151	PI3K-Akt signaling pathway
Igf1	activation	a	Kdr	path:mmu04151	PI3K-Akt signaling pathway
Igf1	activation	a	Kit	path:mmu04151	PI3K-Akt signaling pathway
Igf1	activation	a	Met	path:mmu04151	PI3K-Akt signaling pathway
Igf1	activation	a	Ngfr	path:mmu04151	PI3K-Akt signaling pathway
Vegfa	activation	a	Csf1r	path:mmu04151	PI3K-Akt signaling pathway
Vegfa	activation	a	Fgfr1	path:mmu04151	PI3K-Akt signaling pathway
Vegfa	activation	a	Igf1r	path:mmu04151	PI3K-Akt signaling pathway
Vegfa	activation	a	Insr	path:mmu04151	PI3K-Akt signaling pathway
Vegfa	activation	a	Kdr	path:mmu04151	PI3K-Akt signaling pathway
Vegfa	activation	a	Kit	path:mmu04151	PI3K-Akt signaling pathway
Vegfa	activation	a	Met	path:mmu04151	PI3K-Akt signaling pathway
Vegfa	activation	a	Ngfr	path:mmu04151	PI3K-Akt signaling pathway
Nras	activation	a	Pik3cd	path:mmu04151	PI3K-Akt signaling pathway
Nras	activation	a	Pik3r1	path:mmu04151	PI3K-Akt signaling pathway
Jak2	activation	a	Pik3cd	path:mmu04151	PI3K-Akt signaling pathway
Jak2	activation	a	Pik3r1	path:mmu04151	PI3K-Akt signaling pathway
Jak3	activation	a	Pik3cd	path:mmu04151	PI3K-Akt signaling pathway
Jak3	activation	a	Pik3r1	path:mmu04151	PI3K-Akt signaling pathway
Atf4	expression	ex	Bcl2	path:mmu04151	PI3K-Akt signaling pathway
Creb3l4	expression	ex	Bcl2	path:mmu04151	PI3K-Akt signaling pathway
Igf1	activation	a	Igf1r	path:mmu04152	AMPK signaling pathway
Prkaa2	activation	a	Ppargc1a	path:mmu04152	AMPK signaling pathway
Prkag2	activation	a	Ppargc1a	path:mmu04152	AMPK signaling pathway
Prkag3	activation	a	Ppargc1a	path:mmu04152	AMPK signaling pathway
Igf1	activation	a	Igf1r	path:mmu04150	mTOR signaling pathway
Igf1	activation	a	Insr	path:mmu04150	mTOR signaling pathway
Vegfa	activation	a	Kdr	path:mmu04060	Cytokine-cytokine receptor interaction
Cblc	ubiquitination	ubi	Csf1r	path:mmu04144	Endocytosis
Cblc	ubiquitination	ubi	Igf1r	path:mmu04144	Endocytosis
Cblc	ubiquitination	ubi	Kdr	path:mmu04144	Endocytosis
Cblc	ubiquitination	ubi	Kit	path:mmu04144	Endocytosis
Cblc	ubiquitination	ubi	Met	path:mmu04144	Endocytosis
Prkaca	inhibition	inh	Prkaa2	path:mmu04140	Autophagy - animal
Nras	activation	a	Pik3cd	path:mmu04810	Regulation of actin cytoskeleton
Nras	activation	a	Pik3r1	path:mmu04810	Regulation of actin cytoskeleton
Nras	activation	a	Pik3cg	path:mmu04810	Regulation of actin cytoskeleton
Nras	activation	a	Pik3r5	path:mmu04810	Regulation of actin cytoskeleton
Igf1	activation	a	Igf1r	path:mmu04114	Oocyte meiosis
Igf1r	compound	c	Prkaca	path:mmu04114	Oocyte meiosis
Igf1r	activation	a	Pik3cd	path:mmu04510	Focal adhesion
Igf1r	activation	a	Pik3r1	path:mmu04510	Focal adhesion
Igf1r	activation	a	Pik3cg	path:mmu04510	Focal adhesion
Igf1r	activation	a	Pik3r5	path:mmu04510	Focal adhesion
Kdr	activation	a	Pik3cd	path:mmu04510	Focal adhesion
Kdr	activation	a	Pik3r1	path:mmu04510	Focal adhesion
Kdr	activation	a	Pik3cg	path:mmu04510	Focal adhesion
Kdr	activation	a	Pik3r5	path:mmu04510	Focal adhesion
Met	activation	a	Pik3cd	path:mmu04510	Focal adhesion
Met	activation	a	Pik3r1	path:mmu04510	Focal adhesion
Met	activation	a	Pik3cg	path:mmu04510	Focal adhesion
Met	activation	a	Pik3r5	path:mmu04510	Focal adhesion
Egf	activation	a	Igf1r	path:mmu04510	Focal adhesion
Egf	activation	a	Kdr	path:mmu04510	Focal adhesion
Egf	activation	a	Met	path:mmu04510	Focal adhesion
Igf1	activation	a	Igf1r	path:mmu04510	Focal adhesion
Igf1	activation	a	Kdr	path:mmu04510	Focal adhesion
Igf1	activation	a	Met	path:mmu04510	Focal adhesion
Vegfa	activation	a	Igf1r	path:mmu04510	Focal adhesion
Vegfa	activation	a	Kdr	path:mmu04510	Focal adhesion
Vegfa	activation	a	Met	path:mmu04510	Focal adhesion
Igf1r	activation	a	Shc4	path:mmu04510	Focal adhesion
Kdr	activation	a	Shc4	path:mmu04510	Focal adhesion
Met	activation	a	Shc4	path:mmu04510	Focal adhesion
Rac3	activation	a	Actg1	path:mmu04510	Focal adhesion
Plcb1	compound	c	Prkca	path:mmu04540	Gap junction
Plcb1	compound	c	Prkcb	path:mmu04540	Gap junction
Lifr	activation	a	Jak2	path:mmu04550	Signaling pathways regulating pluripotency of stem cells
Lifr	activation	a	Jak3	path:mmu04550	Signaling pathways regulating pluripotency of stem cells
Jak2	activation	a	Stat3	path:mmu04550	Signaling pathways regulating pluripotency of stem cells
Jak3	activation	a	Stat3	path:mmu04550	Signaling pathways regulating pluripotency of stem cells
Lifr	activation	a	Pik3cd	path:mmu04550	Signaling pathways regulating pluripotency of stem cells
Lifr	activation	a	Pik3r1	path:mmu04550	Signaling pathways regulating pluripotency of stem cells
Lifr	activation	a	Pik3cg	path:mmu04550	Signaling pathways regulating pluripotency of stem cells
Lifr	activation	a	Pik3r5	path:mmu04550	Signaling pathways regulating pluripotency of stem cells
Fgfr1	activation	a	Nras	path:mmu04550	Signaling pathways regulating pluripotency of stem cells
Fgfr1	activation	a	Pik3cd	path:mmu04550	Signaling pathways regulating pluripotency of stem cells
Fgfr1	activation	a	Pik3r1	path:mmu04550	Signaling pathways regulating pluripotency of stem cells
Fgfr1	activation	a	Pik3cg	path:mmu04550	Signaling pathways regulating pluripotency of stem cells
Fgfr1	activation	a	Pik3r5	path:mmu04550	Signaling pathways regulating pluripotency of stem cells
Igf1	activation	a	Igf1r	path:mmu04550	Signaling pathways regulating pluripotency of stem cells
Igf1r	activation	a	Pik3cd	path:mmu04550	Signaling pathways regulating pluripotency of stem cells
Igf1r	activation	a	Pik3r1	path:mmu04550	Signaling pathways regulating pluripotency of stem cells
Igf1r	activation	a	Pik3cg	path:mmu04550	Signaling pathways regulating pluripotency of stem cells
Igf1r	activation	a	Pik3r5	path:mmu04550	Signaling pathways regulating pluripotency of stem cells
Stat3	expression	ex	Myc	path:mmu04550	Signaling pathways regulating pluripotency of stem cells
Mapk11	activation	a	Fos	path:mmu04620	Toll-like receptor signaling pathway
Mapk13	activation	a	Fos	path:mmu04620	Toll-like receptor signaling pathway
Fos	expression	ex	Il6	path:mmu04620	Toll-like receptor signaling pathway
Rela	expression	ex	Il6	path:mmu04620	Toll-like receptor signaling pathway
Rela	activation	a	Il6	path:mmu04621	NOD-like receptor signaling pathway
Plcg1	compound	c	Prkca	path:mmu04650	Natural killer cell mediated cytotoxicity
Plcg1	compound	c	Prkcb	path:mmu04650	Natural killer cell mediated cytotoxicity
Syk	activation	a	Pik3cd	path:mmu04650	Natural killer cell mediated cytotoxicity
Syk	activation	a	Pik3r1	path:mmu04650	Natural killer cell mediated cytotoxicity
Syk	activation	a	Pik3cg	path:mmu04650	Natural killer cell mediated cytotoxicity
Syk	activation	a	Pik3r5	path:mmu04650	Natural killer cell mediated cytotoxicity
Pik3cd	activation	a	Rac3	path:mmu04650	Natural killer cell mediated cytotoxicity
Pik3r1	activation	a	Rac3	path:mmu04650	Natural killer cell mediated cytotoxicity
Pik3cg	activation	a	Rac3	path:mmu04650	Natural killer cell mediated cytotoxicity
Pik3r5	activation	a	Rac3	path:mmu04650	Natural killer cell mediated cytotoxicity
Syk	activation	a	Shc4	path:mmu04650	Natural killer cell mediated cytotoxicity
Nras	indirect effect	ind(e)	Fos	path:mmu04660	T cell receptor signaling pathway
Stat3	expression	ex	Hif1a	path:mmu04659	Th17 cell differentiation
Fos	expression	ex	Il6	path:mmu04657	IL-17 signaling pathway
Rela	expression	ex	Il6	path:mmu04657	IL-17 signaling pathway
Syk	phosphorylation	pho	Blnk	path:mmu04662	B cell receptor signaling pathway
Nras	indirect effect	ind(e)	Fos	path:mmu04662	B cell receptor signaling pathway
Plcg1	compound	c	Prkca	path:mmu04664	Fc epsilon RI signaling pathway
Syk	activation	a	Plcg1	path:mmu04664	Fc epsilon RI signaling pathway
Syk	activation	a	Pik3cd	path:mmu04664	Fc epsilon RI signaling pathway
Syk	activation	a	Pik3r1	path:mmu04664	Fc epsilon RI signaling pathway
Syk	activation	a	Pik3cg	path:mmu04664	Fc epsilon RI signaling pathway
Syk	activation	a	Pik3r5	path:mmu04664	Fc epsilon RI signaling pathway
Pik3cd	activation	a	Rac3	path:mmu04664	Fc epsilon RI signaling pathway
Pik3r1	activation	a	Rac3	path:mmu04664	Fc epsilon RI signaling pathway
Pik3cg	activation	a	Rac3	path:mmu04664	Fc epsilon RI signaling pathway
Pik3r5	activation	a	Rac3	path:mmu04664	Fc epsilon RI signaling pathway
Syk	activation	a	Pik3cd	path:mmu04666	Fc gamma R-mediated phagocytosis
Syk	activation	a	Pik3r1	path:mmu04666	Fc gamma R-mediated phagocytosis
Syk	activation	a	Pik3cg	path:mmu04666	Fc gamma R-mediated phagocytosis
Syk	activation	a	Pik3r5	path:mmu04666	Fc gamma R-mediated phagocytosis
Pik3cd	activation	a	Plcg1	path:mmu04666	Fc gamma R-mediated phagocytosis
Pik3r1	activation	a	Plcg1	path:mmu04666	Fc gamma R-mediated phagocytosis
Pik3cg	activation	a	Plcg1	path:mmu04666	Fc gamma R-mediated phagocytosis
Pik3r5	activation	a	Plcg1	path:mmu04666	Fc gamma R-mediated phagocytosis
Syk	activation	a	Pld1	path:mmu04666	Fc gamma R-mediated phagocytosis
Syk	activation	a	Plcg1	path:mmu04666	Fc gamma R-mediated phagocytosis
Plcg1	activation	a	Prkca	path:mmu04670	Leukocyte transendothelial migration
Plcg1	activation	a	Prkcb	path:mmu04670	Leukocyte transendothelial migration
Ccl21a	activation	a	Cxcr2	path:mmu04062	Chemokine signaling pathway
Ccl21a	activation	a	Cxcr3	path:mmu04062	Chemokine signaling pathway
Ccl21a	activation	a	Cxcr4	path:mmu04062	Chemokine signaling pathway
Ccl21a	activation	a	Cx3cr1	path:mmu04062	Chemokine signaling pathway
Cxcr2	activation	a	Jak2	path:mmu04062	Chemokine signaling pathway
Cxcr2	activation	a	Jak3	path:mmu04062	Chemokine signaling pathway
Cxcr3	activation	a	Jak2	path:mmu04062	Chemokine signaling pathway
Cxcr3	activation	a	Jak3	path:mmu04062	Chemokine signaling pathway
Cxcr4	activation	a	Jak2	path:mmu04062	Chemokine signaling pathway
Cxcr4	activation	a	Jak3	path:mmu04062	Chemokine signaling pathway
Cx3cr1	activation	a	Jak2	path:mmu04062	Chemokine signaling pathway
Cx3cr1	activation	a	Jak3	path:mmu04062	Chemokine signaling pathway
Jak2	activation	a	Stat3	path:mmu04062	Chemokine signaling pathway
Jak3	activation	a	Stat3	path:mmu04062	Chemokine signaling pathway
Gnb3	activation	a	Pik3cd	path:mmu04062	Chemokine signaling pathway
Gnb3	activation	a	Pik3r1	path:mmu04062	Chemokine signaling pathway
Gnb3	activation	a	Pik3cg	path:mmu04062	Chemokine signaling pathway
Gnb3	activation	a	Pik3r5	path:mmu04062	Chemokine signaling pathway
Gnb5	activation	a	Pik3cd	path:mmu04062	Chemokine signaling pathway
Gnb5	activation	a	Pik3r1	path:mmu04062	Chemokine signaling pathway
Gnb5	activation	a	Pik3cg	path:mmu04062	Chemokine signaling pathway
Gnb5	activation	a	Pik3r5	path:mmu04062	Chemokine signaling pathway
Gng8	activation	a	Pik3cd	path:mmu04062	Chemokine signaling pathway
Gng8	activation	a	Pik3r1	path:mmu04062	Chemokine signaling pathway
Gng8	activation	a	Pik3cg	path:mmu04062	Chemokine signaling pathway
Gng8	activation	a	Pik3r5	path:mmu04062	Chemokine signaling pathway
Gng11	activation	a	Pik3cd	path:mmu04062	Chemokine signaling pathway
Gng11	activation	a	Pik3r1	path:mmu04062	Chemokine signaling pathway
Gng11	activation	a	Pik3cg	path:mmu04062	Chemokine signaling pathway
Gng11	activation	a	Pik3r5	path:mmu04062	Chemokine signaling pathway
Gnb3	activation	a	Plcb1	path:mmu04062	Chemokine signaling pathway
Gnb5	activation	a	Plcb1	path:mmu04062	Chemokine signaling pathway
Gng8	activation	a	Plcb1	path:mmu04062	Chemokine signaling pathway
Gng11	activation	a	Plcb1	path:mmu04062	Chemokine signaling pathway
Plcb1	compound	c	Prkcb	path:mmu04062	Chemokine signaling pathway
Prkaca	activation	a	Atf4	path:mmu04911	Insulin secretion
Prkaca	activation	a	Creb3l4	path:mmu04911	Insulin secretion
Prkaca	activation	a	Cacna1s	path:mmu04911	Insulin secretion
Insr	activation	a	Cblc	path:mmu04910	Insulin signaling pathway
Insr	activation	a	Shc4	path:mmu04910	Insulin signaling pathway
Prkaca	activation	a	Atf4	path:mmu04922	Glucagon signaling pathway
Prkaca	activation	a	Creb3l4	path:mmu04922	Glucagon signaling pathway
Prkaca	activation	a	Prkaa2	path:mmu04922	Glucagon signaling pathway
Prkaca	activation	a	Prkag2	path:mmu04922	Glucagon signaling pathway
Prkaca	activation	a	Prkag3	path:mmu04922	Glucagon signaling pathway
Atf4	state change	s(c)	Creb3l4	path:mmu04922	Glucagon signaling pathway
Jak2	activation	a	Stat3	path:mmu04920	Adipocytokine signaling pathway
Stat3	inhibition	inh	Prkaa2	path:mmu04920	Adipocytokine signaling pathway
Stat3	inhibition	inh	Prkag2	path:mmu04920	Adipocytokine signaling pathway
Stat3	inhibition	inh	Prkag3	path:mmu04920	Adipocytokine signaling pathway
Stat3	repression	rep	Ppargc1a	path:mmu04920	Adipocytokine signaling pathway
Plcb1	compound	c	Prkca	path:mmu04912	GnRH signaling pathway
Plcb1	compound	c	Prkcb	path:mmu04912	GnRH signaling pathway
Prkca	indirect effect	ind(e)	Pld1	path:mmu04912	GnRH signaling pathway
Prkcb	indirect effect	ind(e)	Pld1	path:mmu04912	GnRH signaling pathway
Prkaca	activation	a	Atf4	path:mmu04912	GnRH signaling pathway
Igf1	activation	a	Igf1r	path:mmu04913	Ovarian steroidogenesis
Prkaca	activation	a	Atf4	path:mmu04915	Estrogen signaling pathway
Prkaca	activation	a	Creb3l4	path:mmu04915	Estrogen signaling pathway
Igf1	activation	a	Igf1r	path:mmu04914	Progesterone-mediated oocyte maturation
Jak2	activation	a	Shc4	path:mmu04917	Prolactin signaling pathway
Jak2	activation	a	Stat3	path:mmu04917	Prolactin signaling pathway
Prkaca	activation	a	Atf4	path:mmu04918	Thyroid hormone synthesis
Prkaca	activation	a	Creb3l4	path:mmu04918	Thyroid hormone synthesis
Prkca	activation	a	Atf4	path:mmu04918	Thyroid hormone synthesis
Prkca	activation	a	Creb3l4	path:mmu04918	Thyroid hormone synthesis
Prkcb	activation	a	Atf4	path:mmu04918	Thyroid hormone synthesis
Prkcb	activation	a	Creb3l4	path:mmu04918	Thyroid hormone synthesis
Pik3cd	expression	ex	Hif1a	path:mmu04919	Thyroid hormone signaling pathway
Pik3r1	expression	ex	Hif1a	path:mmu04919	Thyroid hormone signaling pathway
Pik3cg	expression	ex	Hif1a	path:mmu04919	Thyroid hormone signaling pathway
Pik3r5	expression	ex	Hif1a	path:mmu04919	Thyroid hormone signaling pathway
Kit	activation	a	Nras	path:mmu04916	Melanogenesis
Prkca	indirect effect	ind(e)	Prkaca	path:mmu04916	Melanogenesis
Prkcb	indirect effect	ind(e)	Prkaca	path:mmu04916	Melanogenesis
Plcb1	compound	c	Prkca	path:mmu04916	Melanogenesis
Plcb1	compound	c	Prkcb	path:mmu04916	Melanogenesis
Camk2a	activation	a	Cacna1s	path:mmu04261	Adrenergic signaling in cardiomyocytes
Camk2a	activation	a	Cacnb2	path:mmu04261	Adrenergic signaling in cardiomyocytes
Camk2a	activation	a	Cacna2d2	path:mmu04261	Adrenergic signaling in cardiomyocytes
Camk2b	activation	a	Cacna1s	path:mmu04261	Adrenergic signaling in cardiomyocytes
Camk2b	activation	a	Cacnb2	path:mmu04261	Adrenergic signaling in cardiomyocytes
Camk2b	activation	a	Cacna2d2	path:mmu04261	Adrenergic signaling in cardiomyocytes
Prkaca	activation	a	Cacna1s	path:mmu04261	Adrenergic signaling in cardiomyocytes
Prkaca	activation	a	Cacnb2	path:mmu04261	Adrenergic signaling in cardiomyocytes
Prkaca	activation	a	Cacna2d2	path:mmu04261	Adrenergic signaling in cardiomyocytes
Prkaca	activation	a	Atf4	path:mmu04261	Adrenergic signaling in cardiomyocytes
Prkaca	activation	a	Creb3l4	path:mmu04261	Adrenergic signaling in cardiomyocytes
Ppp2r1b	inhibition	inh	Cacna1s	path:mmu04261	Adrenergic signaling in cardiomyocytes
Ppp2r1b	inhibition	inh	Cacnb2	path:mmu04261	Adrenergic signaling in cardiomyocytes
Ppp2r1b	inhibition	inh	Cacna2d2	path:mmu04261	Adrenergic signaling in cardiomyocytes
Prkaca	activation	a	Creb3l4	path:mmu04962	Vasopressin-regulated water reabsorption
Igf1	activation	a	Insr	path:mmu04960	Aldosterone-regulated sodium reabsorption
Prkca	activation	a	Pld1	path:mmu04724	Glutamatergic synapse
Prkcb	activation	a	Pld1	path:mmu04724	Glutamatergic synapse
Gnb3	inhibition	inh	Cacna1s	path:mmu04727	GABAergic synapse
Gnb5	inhibition	inh	Cacna1s	path:mmu04727	GABAergic synapse
Gng8	inhibition	inh	Cacna1s	path:mmu04727	GABAergic synapse
Gng11	inhibition	inh	Cacna1s	path:mmu04727	GABAergic synapse
Gnb3	activation	a	Pik3r1	path:mmu04725	Cholinergic synapse
Gnb3	activation	a	Pik3cg	path:mmu04725	Cholinergic synapse
Gnb3	activation	a	Pik3r5	path:mmu04725	Cholinergic synapse
Gnb5	activation	a	Pik3r1	path:mmu04725	Cholinergic synapse
Gnb5	activation	a	Pik3cg	path:mmu04725	Cholinergic synapse
Gnb5	activation	a	Pik3r5	path:mmu04725	Cholinergic synapse
Gng8	activation	a	Pik3r1	path:mmu04725	Cholinergic synapse
Gng8	activation	a	Pik3cg	path:mmu04725	Cholinergic synapse
Gng8	activation	a	Pik3r5	path:mmu04725	Cholinergic synapse
Gng11	activation	a	Pik3r1	path:mmu04725	Cholinergic synapse
Gng11	activation	a	Pik3cg	path:mmu04725	Cholinergic synapse
Gng11	activation	a	Pik3r5	path:mmu04725	Cholinergic synapse
Jak2	activation	a	Pik3cd	path:mmu04725	Cholinergic synapse
Jak2	activation	a	Pik3r1	path:mmu04725	Cholinergic synapse
Jak2	activation	a	Pik3cg	path:mmu04725	Cholinergic synapse
Jak2	activation	a	Pik3r5	path:mmu04725	Cholinergic synapse
Prkaca	activation	a	Atf4	path:mmu04728	Dopaminergic synapse
Prkaca	activation	a	Creb3l4	path:mmu04728	Dopaminergic synapse
Prkaca	activation	a	Mapk11	path:mmu04728	Dopaminergic synapse
Prkaca	activation	a	Mapk13	path:mmu04728	Dopaminergic synapse
Prkca	activation	a	Fos	path:mmu04728	Dopaminergic synapse
Prkcb	activation	a	Fos	path:mmu04728	Dopaminergic synapse
Mapk11	activation	a	Fos	path:mmu04728	Dopaminergic synapse
Mapk13	activation	a	Fos	path:mmu04728	Dopaminergic synapse
Gnb3	activation	a	Plcb1	path:mmu04728	Dopaminergic synapse
Gnb5	activation	a	Plcb1	path:mmu04728	Dopaminergic synapse
Gng8	activation	a	Plcb1	path:mmu04728	Dopaminergic synapse
Gng11	activation	a	Plcb1	path:mmu04728	Dopaminergic synapse
Gnb3	activation	a	Plcb1	path:mmu04726	Serotonergic synapse
Gnb5	activation	a	Plcb1	path:mmu04726	Serotonergic synapse
Gng8	activation	a	Plcb1	path:mmu04726	Serotonergic synapse
Gng11	activation	a	Plcb1	path:mmu04726	Serotonergic synapse
Plcb1	compound	c	Prkca	path:mmu04720	Long-term potentiation
Plcb1	compound	c	Prkcb	path:mmu04720	Long-term potentiation
Plcb1	compound	c	Prkca	path:mmu04730	Long-term depression
Plcb1	compound	c	Prkcb	path:mmu04730	Long-term depression
Igf1	activation	a	Igf1r	path:mmu04730	Long-term depression
Ppp2r1b	inhibition	inh	Prkca	path:mmu04730	Long-term depression
Ppp2r1b	inhibition	inh	Prkcb	path:mmu04730	Long-term depression
Gnb3	activation	a	Mapk11	path:mmu04723	Retrograde endocannabinoid signaling
Gnb3	activation	a	Mapk13	path:mmu04723	Retrograde endocannabinoid signaling
Gnb5	activation	a	Mapk11	path:mmu04723	Retrograde endocannabinoid signaling
Gnb5	activation	a	Mapk13	path:mmu04723	Retrograde endocannabinoid signaling
Gng8	activation	a	Mapk11	path:mmu04723	Retrograde endocannabinoid signaling
Gng8	activation	a	Mapk13	path:mmu04723	Retrograde endocannabinoid signaling
Gng11	activation	a	Mapk11	path:mmu04723	Retrograde endocannabinoid signaling
Gng11	activation	a	Mapk13	path:mmu04723	Retrograde endocannabinoid signaling
Nras	activation	a	Pik3cd	path:mmu04722	Neurotrophin signaling pathway
Nras	activation	a	Pik3r1	path:mmu04722	Neurotrophin signaling pathway
Nras	activation	a	Pik3cg	path:mmu04722	Neurotrophin signaling pathway
Nras	activation	a	Pik3r5	path:mmu04722	Neurotrophin signaling pathway
Camk2a	activation	a	Atf4	path:mmu04722	Neurotrophin signaling pathway
Camk2b	activation	a	Atf4	path:mmu04722	Neurotrophin signaling pathway
Nras	activation	a	Mapk11	path:mmu04722	Neurotrophin signaling pathway
Nras	activation	a	Mapk13	path:mmu04722	Neurotrophin signaling pathway
Ngfr	compound	c	Pik3cd	path:mmu04722	Neurotrophin signaling pathway
Ngfr	compound	c	Pik3r1	path:mmu04722	Neurotrophin signaling pathway
Ngfr	compound	c	Pik3cg	path:mmu04722	Neurotrophin signaling pathway
Ngfr	compound	c	Pik3r5	path:mmu04722	Neurotrophin signaling pathway
Csf1r	activation	a	Pik3cd	path:mmu04380	Osteoclast differentiation
Csf1r	activation	a	Pik3r1	path:mmu04380	Osteoclast differentiation
Csf1r	activation	a	Pik3cg	path:mmu04380	Osteoclast differentiation
Csf1r	activation	a	Pik3r5	path:mmu04380	Osteoclast differentiation
Syk	activation	a	Blnk	path:mmu04380	Osteoclast differentiation
Mapk11	activation	a	Fos	path:mmu04380	Osteoclast differentiation
Mapk13	activation	a	Fos	path:mmu04380	Osteoclast differentiation
Igf1	activation	a	Igf1r	path:mmu04211	Longevity regulating pathway
Igf1r	activation	a	Nras	path:mmu04211	Longevity regulating pathway
Nras	activation	a	Pik3cd	path:mmu04211	Longevity regulating pathway
Nras	activation	a	Pik3r1	path:mmu04211	Longevity regulating pathway
Nras	activation	a	Pik3cg	path:mmu04211	Longevity regulating pathway
Nras	activation	a	Pik3r5	path:mmu04211	Longevity regulating pathway
Igf1	activation	a	Igf1r	path:mmu04213	Longevity regulating pathway - multiple species
Igf1r	activation	a	Nras	path:mmu04213	Longevity regulating pathway - multiple species
Nras	activation	a	Pik3cd	path:mmu04213	Longevity regulating pathway - multiple species
Nras	activation	a	Pik3r1	path:mmu04213	Longevity regulating pathway - multiple species
Nras	activation	a	Pik3cg	path:mmu04213	Longevity regulating pathway - multiple species
Nras	activation	a	Pik3r5	path:mmu04213	Longevity regulating pathway - multiple species
Igf1r	activation	a	Pik3cd	path:mmu04213	Longevity regulating pathway - multiple species
Igf1r	activation	a	Pik3r1	path:mmu04213	Longevity regulating pathway - multiple species
Igf1r	activation	a	Pik3cg	path:mmu04213	Longevity regulating pathway - multiple species
Igf1r	activation	a	Pik3r5	path:mmu04213	Longevity regulating pathway - multiple species
Insr	activation	a	Pik3cd	path:mmu04213	Longevity regulating pathway - multiple species
Insr	activation	a	Pik3cg	path:mmu04213	Longevity regulating pathway - multiple species
Plcb1	compound	c	Prkca	path:mmu04713	Circadian entrainment
Plcb1	compound	c	Prkcb	path:mmu04713	Circadian entrainment
Gnb3	activation	a	Plcb1	path:mmu04713	Circadian entrainment
Gnb5	activation	a	Plcb1	path:mmu04713	Circadian entrainment
Gng8	activation	a	Plcb1	path:mmu04713	Circadian entrainment
Gng11	activation	a	Plcb1	path:mmu04713	Circadian entrainment
Igf1	activation	a	Igf1r	path:mmu05200	Pathways in cancer
Igf1r	activation	a	Plcg1	path:mmu05200	Pathways in cancer
Igf1r	activation	a	Pik3cd	path:mmu05200	Pathways in cancer
Igf1r	activation	a	Pik3r1	path:mmu05200	Pathways in cancer
Igf1r	activation	a	Pik3cg	path:mmu05200	Pathways in cancer
Igf1r	activation	a	Pik3r5	path:mmu05200	Pathways in cancer
Kit	activation	a	Pik3cd	path:mmu05200	Pathways in cancer
Kit	activation	a	Pik3r1	path:mmu05200	Pathways in cancer
Kit	activation	a	Pik3cg	path:mmu05200	Pathways in cancer
Kit	activation	a	Pik3r5	path:mmu05200	Pathways in cancer
Nras	activation	a	Pik3cd	path:mmu05200	Pathways in cancer
Nras	activation	a	Pik3r1	path:mmu05200	Pathways in cancer
Nras	activation	a	Pik3cg	path:mmu05200	Pathways in cancer
Nras	activation	a	Pik3r5	path:mmu05200	Pathways in cancer
Prkca	indirect effect	ind(e)	Nras	path:mmu05200	Pathways in cancer
Prkcb	indirect effect	ind(e)	Nras	path:mmu05200	Pathways in cancer
Rela	expression	ex	Ptgs2	path:mmu05200	Pathways in cancer
Rela	expression	ex	Bcl2	path:mmu05200	Pathways in cancer
Stat3	expression	ex	Vegfa	path:mmu05200	Pathways in cancer
Fos	expression	ex	Vegfa	path:mmu05200	Pathways in cancer
Myc	expression	ex	Vegfa	path:mmu05200	Pathways in cancer
Hif1a	expression	ex	Vegfa	path:mmu05200	Pathways in cancer
Fgfr1	activation	a	Nras	path:mmu05230	Central carbon metabolism in cancer
Kit	activation	a	Nras	path:mmu05230	Central carbon metabolism in cancer
Met	activation	a	Nras	path:mmu05230	Central carbon metabolism in cancer
Met	activation	a	Pik3cd	path:mmu05230	Central carbon metabolism in cancer
Met	activation	a	Pik3r1	path:mmu05230	Central carbon metabolism in cancer
Met	activation	a	Pik3cg	path:mmu05230	Central carbon metabolism in cancer
Met	activation	a	Pik3r5	path:mmu05230	Central carbon metabolism in cancer
Myc	expression	ex	Hk2	path:mmu05230	Central carbon metabolism in cancer
Hif1a	expression	ex	Hk2	path:mmu05230	Central carbon metabolism in cancer
Pik3cd	activation	a	Pld1	path:mmu05231	Choline metabolism in cancer
Pik3r1	activation	a	Pld1	path:mmu05231	Choline metabolism in cancer
Pik3cg	activation	a	Pld1	path:mmu05231	Choline metabolism in cancer
Pik3r5	activation	a	Pld1	path:mmu05231	Choline metabolism in cancer
Nras	activation	a	Pld1	path:mmu05231	Choline metabolism in cancer
Nras	activation	a	Plcg1	path:mmu05231	Choline metabolism in cancer
Igf1	binding/association	b(a)	Igf1r	path:mmu05205	Proteoglycans in cancer
Igf1r	activation	a	Pik3cd	path:mmu05205	Proteoglycans in cancer
Igf1r	activation	a	Pik3r1	path:mmu05205	Proteoglycans in cancer
Igf1r	activation	a	Pik3cg	path:mmu05205	Proteoglycans in cancer
Igf1r	activation	a	Pik3r5	path:mmu05205	Proteoglycans in cancer
Hif1a	expression	ex	Vegfa	path:mmu05205	Proteoglycans in cancer
Met	binding/association	b(a)	Cblc	path:mmu05205	Proteoglycans in cancer
Cblc	inhibition	inh	Myc	path:mmu05205	Proteoglycans in cancer
Cblc	inhibition	inh	Hif1a	path:mmu05205	Proteoglycans in cancer
Vegfa	inhibition	inh	Kdr	path:mmu05205	Proteoglycans in cancer
Fgfr1	activation	a	Plcg1	path:mmu05205	Proteoglycans in cancer
Plcg1	activation	a	Prkca	path:mmu05205	Proteoglycans in cancer
Plcg1	activation	a	Prkcb	path:mmu05205	Proteoglycans in cancer
Vegfa	activation	a	Kdr	path:mmu05205	Proteoglycans in cancer
Rac3	activation	a	Rela	path:mmu05212	Pancreatic cancer
Rela	expression	ex	Vegfa	path:mmu05212	Pancreatic cancer
Stat3	expression	ex	Vegfa	path:mmu05212	Pancreatic cancer
Igf1	activation	a	Igf1r	path:mmu05214	Glioma
Prkca	activation	a	Nras	path:mmu05214	Glioma
Prkcb	activation	a	Nras	path:mmu05214	Glioma
Nras	activation	a	Pik3cd	path:mmu05214	Glioma
Nras	activation	a	Pik3r1	path:mmu05214	Glioma
Nras	activation	a	Pik3cg	path:mmu05214	Glioma
Nras	activation	a	Pik3r5	path:mmu05214	Glioma
Camk2a	activation	a	Nras	path:mmu05214	Glioma
Camk2b	activation	a	Nras	path:mmu05214	Glioma
Igf1r	activation	a	Plcg1	path:mmu05214	Glioma
Igf1r	activation	a	Shc4	path:mmu05214	Glioma
Igf1r	activation	a	Pik3cd	path:mmu05214	Glioma
Igf1r	activation	a	Pik3r1	path:mmu05214	Glioma
Igf1r	activation	a	Pik3cg	path:mmu05214	Glioma
Igf1r	activation	a	Pik3r5	path:mmu05214	Glioma
Kit	activation	a	Pik3cd	path:mmu05221	Acute myeloid leukemia
Kit	activation	a	Pik3r1	path:mmu05221	Acute myeloid leukemia
Kit	activation	a	Pik3cg	path:mmu05221	Acute myeloid leukemia
Kit	activation	a	Pik3r5	path:mmu05221	Acute myeloid leukemia
Nras	activation	a	Pik3cd	path:mmu05221	Acute myeloid leukemia
Nras	activation	a	Pik3r1	path:mmu05221	Acute myeloid leukemia
Nras	activation	a	Pik3cg	path:mmu05221	Acute myeloid leukemia
Nras	activation	a	Pik3r5	path:mmu05221	Acute myeloid leukemia
Kit	activation	a	Stat3	path:mmu05221	Acute myeloid leukemia
Egf	activation	a	Fgfr1	path:mmu05218	Melanoma
Egf	activation	a	Igf1r	path:mmu05218	Melanoma
Egf	activation	a	Met	path:mmu05218	Melanoma
Igf1	activation	a	Fgfr1	path:mmu05218	Melanoma
Igf1	activation	a	Igf1r	path:mmu05218	Melanoma
Igf1	activation	a	Met	path:mmu05218	Melanoma
Nras	activation	a	Pik3cd	path:mmu05218	Melanoma
Nras	activation	a	Pik3r1	path:mmu05218	Melanoma
Nras	activation	a	Pik3cg	path:mmu05218	Melanoma
Nras	activation	a	Pik3r5	path:mmu05218	Melanoma
Fgfr1	activation	a	Nras	path:mmu05218	Melanoma
Igf1r	activation	a	Nras	path:mmu05218	Melanoma
Met	activation	a	Nras	path:mmu05218	Melanoma
Hif1a	expression	ex	Vegfa	path:mmu05211	Renal cell carcinoma
Egf	activation	a	Fgfr1	path:mmu05215	Prostate cancer
Egf	activation	a	Igf1r	path:mmu05215	Prostate cancer
Igf1	activation	a	Fgfr1	path:mmu05215	Prostate cancer
Igf1	activation	a	Igf1r	path:mmu05215	Prostate cancer
Fgfr1	activation	a	Pik3cd	path:mmu05215	Prostate cancer
Fgfr1	activation	a	Pik3r1	path:mmu05215	Prostate cancer
Fgfr1	activation	a	Pik3cg	path:mmu05215	Prostate cancer
Fgfr1	activation	a	Pik3r5	path:mmu05215	Prostate cancer
Igf1r	activation	a	Pik3cd	path:mmu05215	Prostate cancer
Igf1r	activation	a	Pik3r1	path:mmu05215	Prostate cancer
Igf1r	activation	a	Pik3cg	path:mmu05215	Prostate cancer
Igf1r	activation	a	Pik3r5	path:mmu05215	Prostate cancer
Rela	expression	ex	Bcl2	path:mmu05215	Prostate cancer
Igf1	activation	a	Igf1r	path:mmu05224	Breast cancer
Fgfr1	activation	a	Shc4	path:mmu05224	Breast cancer
Igf1r	activation	a	Shc4	path:mmu05224	Breast cancer
Fgfr1	activation	a	Pik3cd	path:mmu05224	Breast cancer
Fgfr1	activation	a	Pik3r1	path:mmu05224	Breast cancer
Fgfr1	activation	a	Pik3cg	path:mmu05224	Breast cancer
Fgfr1	activation	a	Pik3r5	path:mmu05224	Breast cancer
Igf1r	activation	a	Pik3cd	path:mmu05224	Breast cancer
Igf1r	activation	a	Pik3r1	path:mmu05224	Breast cancer
Igf1r	activation	a	Pik3cg	path:mmu05224	Breast cancer
Igf1r	activation	a	Pik3r5	path:mmu05224	Breast cancer
Kit	activation	a	Shc4	path:mmu05224	Breast cancer
Kit	activation	a	Pik3cd	path:mmu05224	Breast cancer
Kit	activation	a	Pik3r1	path:mmu05224	Breast cancer
Kit	activation	a	Pik3cg	path:mmu05224	Breast cancer
Kit	activation	a	Pik3r5	path:mmu05224	Breast cancer
Rela	expression	ex	Ptgs2	path:mmu05222	Small cell lung cancer
Tlr2	activation	a	Fos	path:mmu05323	Rheumatoid arthritis
Tlr2	activation	a	Rela	path:mmu05321	Inflammatory bowel disease (IBD)
Il6	activation	a	Stat3	path:mmu05321	Inflammatory bowel disease (IBD)
Prkaca	activation	a	Atf4	path:mmu05030	Cocaine addiction
Prkaca	activation	a	Creb3l4	path:mmu05030	Cocaine addiction
Camk2a	activation	a	Atf4	path:mmu05031	Amphetamine addiction
Camk2a	activation	a	Creb3l4	path:mmu05031	Amphetamine addiction
Camk2b	activation	a	Atf4	path:mmu05031	Amphetamine addiction
Camk2b	activation	a	Creb3l4	path:mmu05031	Amphetamine addiction
Atf4	expression	ex	Fos	path:mmu05031	Amphetamine addiction
Creb3l4	expression	ex	Fos	path:mmu05031	Amphetamine addiction
Prkaca	activation	a	Gnb3	path:mmu05032	Morphine addiction
Prkaca	activation	a	Gnb5	path:mmu05032	Morphine addiction
Prkaca	activation	a	Gng8	path:mmu05032	Morphine addiction
Prkaca	activation	a	Gng11	path:mmu05032	Morphine addiction
Prkca	activation	a	Gnb3	path:mmu05032	Morphine addiction
Prkca	activation	a	Gnb5	path:mmu05032	Morphine addiction
Prkca	activation	a	Gng8	path:mmu05032	Morphine addiction
Prkca	activation	a	Gng11	path:mmu05032	Morphine addiction
Prkcb	activation	a	Gnb3	path:mmu05032	Morphine addiction
Prkcb	activation	a	Gnb5	path:mmu05032	Morphine addiction
Prkcb	activation	a	Gng8	path:mmu05032	Morphine addiction
Prkcb	activation	a	Gng11	path:mmu05032	Morphine addiction
Prkaca	activation	a	Atf4	path:mmu05034	Alcoholism
Prkaca	activation	a	Creb3l4	path:mmu05034	Alcoholism
Prkaca	activation	a	Cacna1s	path:mmu05414	Dilated cardiomyopathy
Prkaca	activation	a	Cacnb2	path:mmu05414	Dilated cardiomyopathy
Prkaca	activation	a	Cacna2d2	path:mmu05414	Dilated cardiomyopathy
Rela	expression	ex	Il6	path:mmu04932	Non-alcoholic fatty liver disease (NAFLD)
Prkcb	inhibition	inh	Insr	path:mmu04931	Insulin resistance
Il6	activation	a	Stat3	path:mmu04931	Insulin resistance
Rela	expression	ex	Il6	path:mmu04931	Insulin resistance
Creb3l4	activation	a	Ppargc1a	path:mmu04931	Insulin resistance
Prkca	activation	a	Mapk11	path:mmu04933	AGE-RAGE signaling pathway in diabetic complications
Prkca	activation	a	Mapk13	path:mmu04933	AGE-RAGE signaling pathway in diabetic complications
Prkcb	activation	a	Mapk11	path:mmu04933	AGE-RAGE signaling pathway in diabetic complications
Prkcb	activation	a	Mapk13	path:mmu04933	AGE-RAGE signaling pathway in diabetic complications
Mapk11	activation	a	Rela	path:mmu04933	AGE-RAGE signaling pathway in diabetic complications
Mapk13	activation	a	Rela	path:mmu04933	AGE-RAGE signaling pathway in diabetic complications
Rela	expression	ex	Vegfa	path:mmu04933	AGE-RAGE signaling pathway in diabetic complications
Rela	expression	ex	Il6	path:mmu04933	AGE-RAGE signaling pathway in diabetic complications
Nras	activation	a	Mapk11	path:mmu04933	AGE-RAGE signaling pathway in diabetic complications
Nras	activation	a	Mapk13	path:mmu04933	AGE-RAGE signaling pathway in diabetic complications
Mapk11	inhibition	inh	Bcl2	path:mmu04933	AGE-RAGE signaling pathway in diabetic complications
Mapk13	inhibition	inh	Bcl2	path:mmu04933	AGE-RAGE signaling pathway in diabetic complications
Jak2	activation	a	Stat3	path:mmu04933	AGE-RAGE signaling pathway in diabetic complications
Mapk11	activation	a	Fos	path:mmu05132	Salmonella infection
Mapk13	activation	a	Fos	path:mmu05132	Salmonella infection
Mapk11	activation	a	Rela	path:mmu05132	Salmonella infection
Mapk13	activation	a	Rela	path:mmu05132	Salmonella infection
Mapk11	activation	a	Fos	path:mmu05133	Pertussis
Mapk13	activation	a	Fos	path:mmu05133	Pertussis
Rela	expression	ex	Il6	path:mmu05152	Tuberculosis
Mapk11	expression	ex	Il6	path:mmu05152	Tuberculosis
Mapk13	expression	ex	Il6	path:mmu05152	Tuberculosis
Cblc	ubiquitination	ubi	Met	path:mmu05100	Bacterial invasion of epithelial cells
Prkaca	activation	a	Atf4	path:mmu05166	HTLV-I infection
Jak3	activation	a	Stat3	path:mmu05162	Measles
Rela	expression	ex	Bcl2	path:mmu05161	Hepatitis B
Rela	expression	ex	Il6	path:mmu05161	Hepatitis B
Syk	activation	a	Plcg1	path:mmu05169	Epstein-Barr virus infection
Tyk2	activation	a	Stat3	path:mmu05169	Epstein-Barr virus infection
Plcb1	compound	c	Prkca	path:mmu05146	Amoebiasis
Plcb1	compound	c	Prkcb	path:mmu05146	Amoebiasis
Tyk2	activation	a	Stat3	path:mmu05145	Toxoplasmosis
Mapk11	activation	a	Fos	path:mmu05142	Chagas disease (American trypanosomiasis)
Mapk13	activation	a	Fos	path:mmu05142	Chagas disease (American trypanosomiasis)
Mapk11	activation	a	Ppp2r1b	path:mmu05142	Chagas disease (American trypanosomiasis)
Mapk13	activation	a	Ppp2r1b	path:mmu05142	Chagas disease (American trypanosomiasis)
Rela	activation	a	Ppp2r1b	path:mmu05142	Chagas disease (American trypanosomiasis)
Plcb1	compound	c	Prkca	path:mmu05143	African trypanosomiasis
Plcb1	compound	c	Prkcb	path:mmu05143	African trypanosomiasis
Igf1	activation	a	Igf1r	path:mmu01521	EGFR tyrosine kinase inhibitor resistance
Vegfa	activation	a	Kdr	path:mmu01521	EGFR tyrosine kinase inhibitor resistance
Met	activation	a	Jak2	path:mmu01521	EGFR tyrosine kinase inhibitor resistance
Met	activation	a	Plcg1	path:mmu01521	EGFR tyrosine kinase inhibitor resistance
Met	activation	a	Shc4	path:mmu01521	EGFR tyrosine kinase inhibitor resistance
Igf1r	activation	a	Jak2	path:mmu01521	EGFR tyrosine kinase inhibitor resistance
Igf1r	activation	a	Plcg1	path:mmu01521	EGFR tyrosine kinase inhibitor resistance
Igf1r	activation	a	Shc4	path:mmu01521	EGFR tyrosine kinase inhibitor resistance
Kdr	activation	a	Jak2	path:mmu01521	EGFR tyrosine kinase inhibitor resistance
Kdr	activation	a	Plcg1	path:mmu01521	EGFR tyrosine kinase inhibitor resistance
Kdr	activation	a	Shc4	path:mmu01521	EGFR tyrosine kinase inhibitor resistance
Jak2	activation	a	Stat3	path:mmu01521	EGFR tyrosine kinase inhibitor resistance
Igf1	activation	a	Igf1r	path:mmu01522	Endocrine resistance
Igf1r	activation	a	Shc4	path:mmu01522	Endocrine resistance
Igf1r	activation	a	Pik3cd	path:mmu01522	Endocrine resistance
Igf1r	activation	a	Pik3r1	path:mmu01522	Endocrine resistance
Igf1r	activation	a	Pik3cg	path:mmu01522	Endocrine resistance
Igf1r	activation	a	Pik3r5	path:mmu01522	Endocrine resistance
Prkaca	activation	a	Fos	path:mmu01522	Endocrine resistance
Mapk11	activation	a	Fos	path:mmu01522	Endocrine resistance
Mapk13	activation	a	Fos	path:mmu01522	Endocrine resistance
Rela	expression	ex	Il6	path:mmu01523	Antifolate resistance

## Sheet: Gene information
Gene Symbol	Synonyms	Description	Style	Degree	Outdegree	Indegree	BetweennessCentrality	Kcores
Plcb1	3110043I21Rik|AI132408|Plcb|mKIAA0581	phospholipase C, beta 1	none	24	10	14	0.07508	8
Prkag3	AMPKg3L|AMPKg3S|Amkg3|Ampkg3	protein kinase, AMP-activated, gamma 3 non-catatlytic subunit	none	3	1	2	2.48285e-05	3
Gng8	G(y)8	guanine nucleotide binding protein (G protein), gamma 8	none	11	8	3	0.0025303	8
Plcg1	AI894140|Cded|Plc-1|Plc-gamma1|Plcg-1	phospholipase C, gamma 1	none	21	8	13	0.0881405	8
Blnk	BASH|Bca|Ly-57|Ly57|Lyw-57|SLP-65	B cell linker	none	1	0	1	0	1
Prkaa2	2310008I11Rik|A830082D05|AMPKalpha2	protein kinase, AMP-activated, alpha 2 catalytic subunit	none	3	1	2	4.96569e-05	3
Ppp2r1b	2410091N08Rik|AI790395	protein phosphatase 2, regulatory subunit A, beta	none	9	6	3	0.0159643	6
Cacnb2	AW060387|CAB2|Cavbeta2|Cchb2	calcium channel, voltage-dependent, beta 2 subunit	none	4	0	4	0	4
Kdr	6130401C07|Flk-1|Flk1|Krd-1|Ly73|VEGFR-2|VEGFR2|sVEGFR-2	kinase insert domain protein receptor	none	12	8	4	0.0147035	8
Vegfa	Vegf|Vpf	vascular endothelial growth factor A	none	13	8	5	0.148546	8
Cacna2d2	Cacna2d|a2d2|du|mKIAA0558|td|torpid	calcium channel, voltage-dependent, alpha 2/delta subunit 2	none	4	0	4	0	4
Rela	p65	v-rel reticuloendotheliosis viral oncogene homolog A (avian)	none	10	6	4	0.0532818	6
Pik3r1	PI3K|p50alpha|p55alpha|p85alpha	phosphatidylinositol 3-kinase, regulatory subunit, polypeptide 1 (p85 alpha)	none	26	4	22	0.0340037	8
Ctf1	CT-1	cardiotrophin 1	none	1	1	0	0	1
Gnb5	GBS|Gbeta5|flr	guanine nucleotide binding protein (G protein), beta 5	none	11	8	3	0.0025303	8
Met	AI838057|HGF|HGFR|Par4|c-Met	met proto-oncogene	none	14	10	4	0.0151131	8
Mapk13	SAPK4|Serk4	mitogen-activated protein kinase 13	none	13	5	8	0.0189715	8
Hk2	AI642394|HKII	hexokinase 2	none	2	0	2	0	2
Syk	Sykb	spleen tyrosine kinase	none	8	8	0	0	7
Pik3cg	5830428L06Rik|PI3Kgamma|p110gamma	phosphoinositide-3-kinase, catalytic, gamma polypeptide	none	25	4	21	0.02967	8
Prkag2	2410051C13Rik|AAKG|AAKG2|AI854673|H91620p|WPWS	protein kinase, AMP-activated, gamma 2 non-catalytic subunit	none	3	1	2	2.48285e-05	3
Camk2a	CaMKII|R74975|mKIAA0968	calcium/calmodulin-dependent protein kinase II alpha	none	8	6	2	0.0100873	6
Shc4	6230417E10Rik|9930029B02Rik|Gm685|RaLP	SHC (Src homology 2 domain containing) family, member 4	none	10	0	10	0	8
Cxcr2	CD128|CDw128|Cmkar2|Gpcr16|IL-8Rh|IL-8rb|IL8RA|Il8rb|mIL-8RH	chemokine (C-X-C motif) receptor 2	none	4	3	1	0.00727673	3
Pld1	AA536939|C85393|Pld1a|Pld1b|mPLD1	phospholipase D1	none	8	0	8	0	7
Cblc	2310076I21Rik|2310079L19Rik|Cbl3	Casitas B-lineage lymphoma c	none	9	7	2	0.00596011	7
Bcl2	AW986256|Bcl-2|C430015F12Rik|D630044D05Rik|D830018M01Rik	B cell leukemia/lymphoma 2	none	7	0	7	0	6
Jak3	fae|wil	Janus kinase 3	none	10	5	5	0.0186902	6
Gng11	0610037B21Rik	guanine nucleotide binding protein (G protein), gamma 11	none	11	8	3	0.0025303	8
Nras	AV095280|N-ras	neuroblastoma ras oncogene	none	17	9	8	0.0399329	8
Jak2	Fd17	Janus kinase 2	none	14	6	8	0.0374699	8
Igf1r	A330103N21Rik|CD221|D930020L01|IGF-1R|hyft	insulin-like growth factor I receptor	none	14	10	4	0.0524141	8
Ngfr	LNGFR|Tnfrsf16|p75|p75NGFR|p75NTR	nerve growth factor receptor (TNFR superfamily, member 16)	none	9	6	3	0.00201804	8
Il11	IL-11	interleukin 11	none	1	1	0	0	1
Alox12	9930022G08Rik|Alox12p|P-12LO	arachidonate 12-lipoxygenase	none	2	2	0	0	2
Rac3	Rac1B	RAS-related C3 botulinum substrate 3	none	6	2	4	0.0440434	5
Prkaca	PKCD|Pkaca	protein kinase, cAMP dependent, catalytic, alpha	none	19	16	3	0.0489883	8
Ccl21a	6CKBAC2|6Ckine|ALP|AW987545|CKb9|SCYA21a|SLC|Scya21|Scya21b|Tca4|plt	chemokine (C-C motif) ligand 21A (serine)	none	4	4	0	0	3
Creb3l4	1700012K17Rik|5330432F22Rik|AIBZIP|AV040530|AV258827|CREB4|JAL|TISP40|acre1	cAMP responsive element binding protein 3-like 4	none	9	3	6	0.00834392	6
Cxcr4	CD184|Cmkar4|LESTR|PB-CKR|PBSF/SDF-1|Sdf1r|b2b220Clo	chemokine (C-X-C motif) receptor 4	none	3	2	1	0.00129117	3
Ppargc1a	A830037N07Rik|Gm11133|PGC-1|PPARGC-1-alpha|Pgc-1alpha|Pgc1|Pgco1|Ppargc1	peroxisome proliferative activated receptor, gamma, coactivator 1 alpha	none	5	0	5	0	3
Hif1a	AA959795|HIF-1-alpha|HIF1-alpha|HIF1alpha|MOP1|bHLHe78	hypoxia inducible factor 1, alpha subunit	none	9	2	7	0.0388478	6
Pik3r5	AV230647|F730038I15Rik	phosphoinositide-3-kinase, regulatory subunit 5, p101	none	26	4	22	0.0299691	8
Pik3cd	2410099E07Rik|2610208K16Rik|AW545373|p110delta	phosphatidylinositol 3-kinase catalytic delta polypeptide	none	25	4	21	0.0324244	8
Tlr2	Ly105	toll-like receptor 2	none	2	2	0	0	2
Il15	AI503618|IL-15	interleukin 15	none	1	1	0	0	1
Stat3	1110034C02Rik|AW109958|Aprf	signal transducer and activator of transcription 3	none	12	7	5	0.0673032	6
Plcd1	AW212592|C79986	phospholipase C, delta 1	none	9	7	2	0.000416191	8
Alox5	5-LO|5-LOX|5LO|5LX|AI850497|F730011J02	arachidonate 5-lipoxygenase	none	2	1	1	0	2
Lifr	A230075M04Rik|AW061234|LIF	leukemia inhibitory factor receptor	none	11	7	4	0.0606564	6
Prkcb	PKC-B|PKC-Beta|Pkcb|Prkcb1|Prkcb2	protein kinase C, beta	none	17	13	4	0.070327	8
Cxcr3	Cd183|Cmkar3	chemokine (C-X-C motif) receptor 3	none	3	2	1	0.00129117	3
Igf1	C730016P09Rik|Igf-1|Igf-I	insulin-like growth factor 1	none	8	8	0	0	8
Tyk2	JTK1	tyrosine kinase 2	none	6	5	1	0.00141379	6
Il6	Il-6	interleukin 6	none	6	2	4	0.0517474	6
Egf	AI790464	epidermal growth factor	none	8	8	0	0	8
Actg1	AL023024|Actg|Actl|E51	actin, gamma, cytoplasmic 1	none	1	0	1	0	1
Ptgs2	COX2|Cox-2|PES-2|PGHS-2|PHS II|PHS-2|Pghs2|TIS10|gripghs	prostaglandin-endoperoxide synthase 2	none	3	0	3	0	2
Mapk11	P38b|Prkm11|Sapk2|Sapk2b|p38-2|p38beta|p38beta2	mitogen-activated protein kinase 11	none	13	5	8	0.0189715	8
Myc	AU016757|Myc2|Niard|Nird|bHLHe39	myelocytomatosis oncogene	none	4	2	2	0.00105534	3
Cx3cr1	-	chemokine (C-X3-C motif) receptor 1	none	3	2	1	0.00129117	3
Atf4	Atf-4|C/ATF|CREB2|TAXREB67	activating transcription factor 4	none	8	3	5	0.00381298	6
Pi4k2a	Pi4k2	phosphatidylinositol 4-kinase type 2 alpha	none	5	5	0	0	5
Cacna1s	AW493108|Cav1.1|Cchl1a3|fmd|mdg|sj	calcium channel, voltage-dependent, L type, alpha 1S subunit	none	8	0	8	0	6
Kit	Bs|CD117|Fdc|Gsfsco1|Gsfsco5|Gsfsow3|SCO1|SCO5|SOW3|Ssm|Tr-kit|W|c-KIT	kit oncogene	none	12	8	4	0.0117837	8
Prkca	AI875142|Pkca	protein kinase C, alpha	none	16	12	4	0.0610784	8
Camk2b	CaMKII	calcium/calmodulin-dependent protein kinase II, beta	none	8	6	2	0.0100873	6
Gnb3	Gnb-3	guanine nucleotide binding protein (G protein), beta 3	none	11	8	3	0.0025303	8
Insr	4932439J01Rik|CD220|D630014A15Rik|IR|IR-A|IR-B	insulin receptor	none	11	7	4	0.0151357	8
Fgfr1	AW208770|Eask|FGFR-I|FLG|Fgfr-1|Flt-2|Hspy|MFR|bFGF-R-1|c-fgr	fibroblast growth factor receptor 1	none	11	8	3	0.00785139	8
Csf1r	AI323359|CD115|CSF-1R|Csfmr|Fim-2|Fim2|Fms|M-CSF-R|M-CSFR	colony stimulating factor 1 receptor	none	10	6	4	0.00224159	8
Gli2	-	GLI-Kruppel family member GLI2	none	2	1	1	8.54973e-05	2
Fos	D12Rfj1|c-fos|cFos	FBJ osteosarcoma oncogene	none	11	2	9	0.0582886	7
