# Supplementary material for: Time Series Transcriptomic Analysis by RNA Sequencing Reveals a Key Role of PI3K in Sepsis-Induced Myocardial Injury in Mice
Source: Frontiers journal article supplement (doi:10.3389/fphys.2022.903164), 2022-06-01
Supplement: Data_Sheet_2.zip [file Data_Sheet_2.zip]

## Sheet: Sheet1
Days	CLP	CLP+LY	CLP+CZC
2	1
2	1
3	1
3	1
3	0
3	0
3	0
3	0
3	0
3	0
1		0
1		0
1		0
1		0
1		0
1		0
1		0
1		0
1		0
1		0
2		1
2		1
2		1
2		1
3		1
3		0
3		0
3		0
3		0
3		0
1			0
1			0
1			0
1			0
1			0
1			0
1			0
1			0
1			0
1			0
2			0
2			0
2			0
2			0
2			0
2			0
2			0
2			0
2			0
2			0
3			1
3			0
3			0
3			0
3			0
3			0
3			0
3			0
3			0
3			0
